# Supplementary material
Source: PubMed Central journal article supplement (PMC6046049)
Supplement: 41386_2018_43_MOESM5_ESM.pdf [file 41386_2018_43_MOESM5_ESM.pdf]

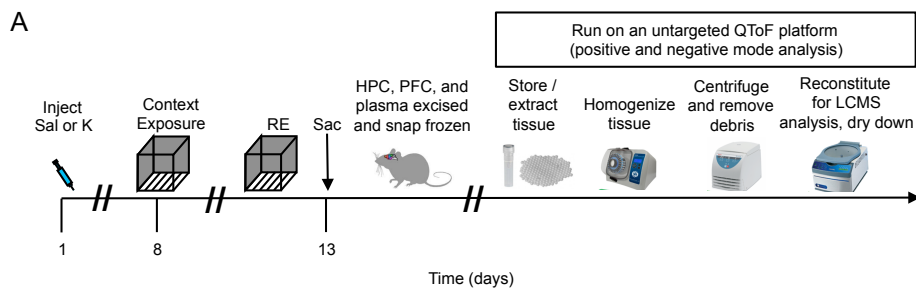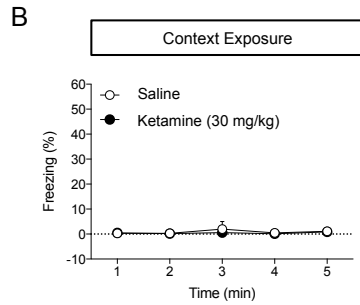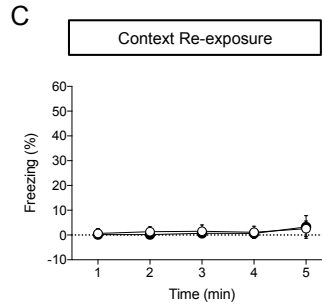

Purines

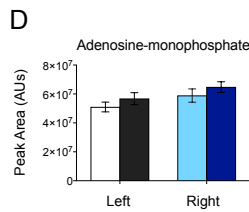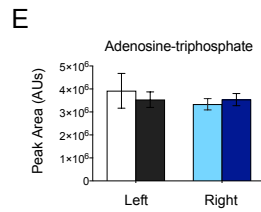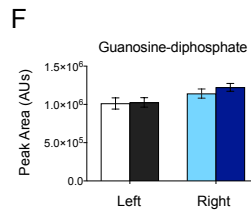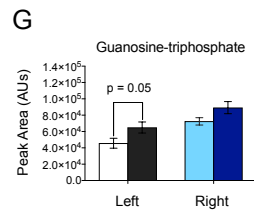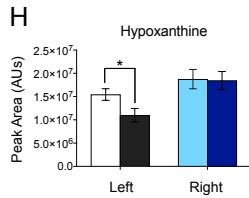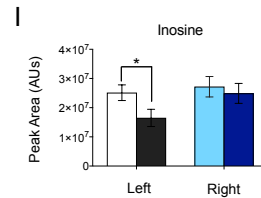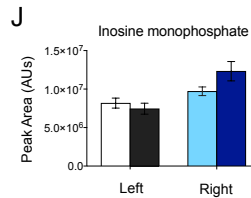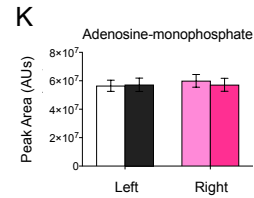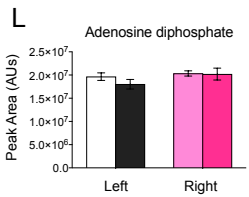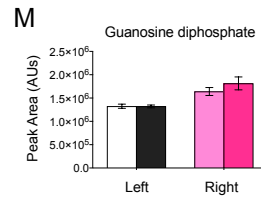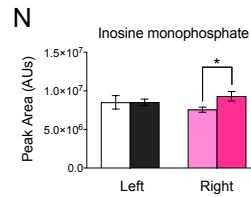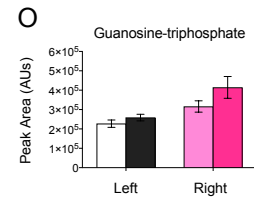

Pyrimidines

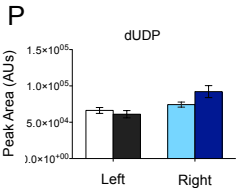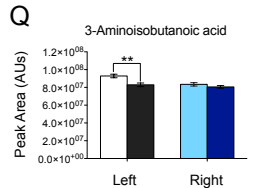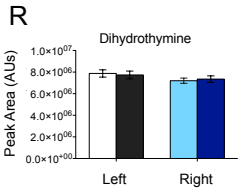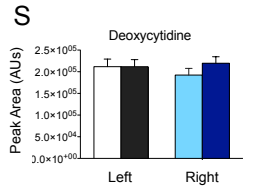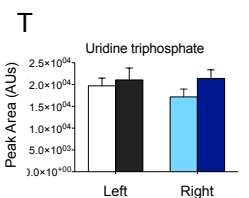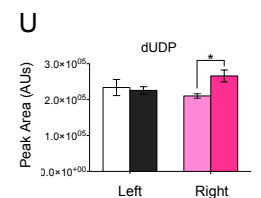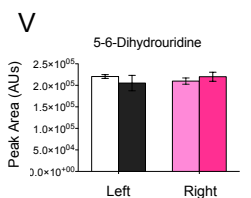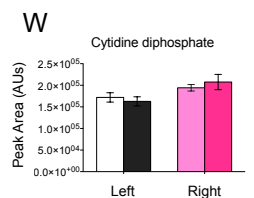

PFC: □ Sal, Left    ■ K (30 mg/kg), Left    □ Sal, Right    ■ K (30 mg/kg), Right

HPC: □ Sal, Left    ■ K (30 mg/kg), Left    □ Sal, Right    ■ K (30 mg/kg), Right
