# Supplementary material
Source: PubMed Central journal article supplement (PMC6046049)
Supplement: 41386_2018_43_MOESM7_ESM.pdf [file 41386_2018_43_MOESM7_ESM.pdf]

**Supplemental Table 1.**

| Behavioral Paradigm                     | Abbrev  | Measurement | Comparison          | F                    | ° of freedom         | p                   | *                    | Fig.                 |
|-----------------------------------------|---------|-------------|---------------------|----------------------|----------------------|---------------------|----------------------|----------------------|
| Contextual Fear Conditioning (3-shock)  | CFC D1  | Freezing    | Drug                | 3.528                | 1,68                 | 0.0776              | -                    | 1B                   |
|                                         |         |             | Time                | 33.644               | 4,68                 | <0.0001             | ***                  |                      |
|                                         |         |             | Drug x Time         | 2.275                | 4,68                 | 0.0701              | -                    |                      |
|                                         | CFC D2  | Freezing    | Drug                | 5.191                | 1,68                 | 0.0359              | *                    | 1C                   |
|                                         |         |             | Time                | 27.495               | 4,68                 | <0.0001             | ***                  |                      |
|                                         |         |             | Drug x Time         | 0.519                | 4,68                 | 0.5996              | -                    |                      |
| Contextual Fear Conditioning (No shock) | CFC D1  | Freezing    | Drug                | 0.679                | 1,64                 | 0.0422              | -                    | S5B                  |
|                                         |         |             | Time                | 3.402                | 4,64                 | 0.0138              | *                    |                      |
|                                         |         |             | Drug x Time         | 1.579                | 4,64                 | 0.2621              | -                    |                      |
|                                         | CFC D2  | Freezing    | Drug                | 0.402                | 1,64                 | 0.5353              | -                    | S5C                  |
|                                         |         |             | Time                | 4.3                  | 4,64                 | 0.0038              | **                   |                      |
|                                         |         |             | Drug x Time         | 0.528                | 4,64                 | 0.7159              | -                    |                      |
| Mouse ID                                | CFC     | Drug        | Left PFC Weight (g) | Right PFC Weight (g) | Total PFC Weight (g) | Left HPC Weight (g) | Right HPC Weight (g) | Total HPC Weight (g) |
| 1                                       | 3-shock | Sal         | 0.0156              | 0.0132               | 0.0288               | 0.0156              | 0.0146               | 0.0302               |
| 2                                       | 3-shock | Sal         | 0.0151              | 0.0160               | 0.0311               | 0.0209              | 0.0190               | 0.0399               |
| 3                                       | 3-shock | Sal         | 0.0200              | 0.0200               | 0.0400               | 0.0107              | 0.0254               | 0.0361               |
| 4                                       | 3-shock | Sal         | 0.0284              | 0.0223               | 0.0507               | 0.0141              | 0.0168               | 0.0309               |
| 5                                       | 3-shock | Sal         | 0.0221              | 0.0210               | 0.0431               | 0.0162              | 0.0191               | 0.0353               |
| 6                                       | 3-shock | Sal         | 0.0122              | 0.0100               | 0.0222               | 0.0160              | 0.0150               | 0.0310               |
| 7                                       | 3-shock | Sal         | 0.0150              | 0.0110               | 0.0260               | 0.0128              | 0.0170               | 0.0298               |
| 8                                       | 3-shock | Sal         | 0.0140              | 0.0134               | 0.0274               | 0.0125              | 0.0145               | 0.0270               |
| 9                                       | 3-shock | Sal         | 0.0140              | 0.0150               | 0.0290               | 0.0157              | 0.0124               | 0.0281               |
| 10                                      | 3-shock | Sal         | 0.0130              | 0.0120               | 0.0250               | 0.0132              | 0.0115               | 0.0247               |
| 11                                      | 3-shock | K           | 0.0195              | 0.0205               | 0.0400               | 0.0150              | 0.0155               | 0.0305               |
| 12                                      | 3-shock | K           | 0.0270              | 0.0272               | 0.0542               | 0.0219              | 0.0207               | 0.0426               |
| 13                                      | 3-shock | K           | 0.0170              | 0.0130               | 0.0300               | 0.0140              | 0.0140               | 0.0280               |
| 14                                      | 3-shock | K           | 0.0248              | 0.0223               | 0.0471               | 0.0155              | 0.0144               | 0.0299               |
| 15                                      | 3-shock | K           | 0.0195              | 0.0174               | 0.0369               | 0.0139              | 0.0123               | 0.0262               |
| 16                                      | 3-shock | K           | 0.0137              | 0.0110               | 0.0247               | 0.0160              | 0.0147               | 0.0307               |

|    |          |     |        |        |        |        |        |        |
|----|----------|-----|--------|--------|--------|--------|--------|--------|
| 17 | 3-shock  | K   | 0.0130 | 0.0150 | 0.0280 | 0.0124 | 0.0135 | 0.0259 |
| 18 | 3-shock  | K   | 0.0200 | 0.0200 | 0.0400 | 0.0143 | 0.0130 | 0.0273 |
| 19 | 3-shock  | K   | 0.0150 | 0.0150 | 0.0300 | 0.0190 | 0.0159 | 0.0349 |
| 20 | No shock | Sal | 0.0150 | 0.0129 | 0.0279 | 0.0155 | 0.0177 | 0.0332 |
| 21 | No shock | K   | 0.0183 | 0.0213 | 0.0396 | 0.0137 | 0.0133 | 0.027  |
| 22 | No shock | Sal | 0.0205 | 0.0181 | 0.0386 | 0.0221 | 0.0139 | 0.036  |
| 23 | No shock | Sal | 0.0152 | 0.0146 | 0.0298 | 0.017  | 0.0138 | 0.0308 |
| 24 | No shock | Sal | 0.0208 | 0.0200 | 0.0408 | 0.019  | 0.017  | 0.036  |
| 25 | No shock | K   | 0.0180 | 0.0238 | 0.0418 | 0.019  | 0.015  | 0.034  |
| 26 | No shock | K   | 0.0166 | 0.0183 | 0.0349 | 0.0178 | 0.015  | 0.0328 |
| 27 | No shock | K   | 0.0250 | 0.0193 | 0.0443 | 0.01   | 0.0133 | 0.0233 |
| 28 | No shock | Sal | 0.0197 | 0.0238 | 0.0435 | 0.0144 | 0.0153 | 0.0297 |
| 29 | No shock | Sal | 0.0278 | 0.0227 | 0.0505 | 0.0176 | 0.017  | 0.0346 |
| 30 | No shock | Sal | 0.0190 | 0.0242 | 0.0432 | 0.0159 | 0.0134 | 0.0293 |
| 31 | No shock | Sal | 0.0200 | 0.0219 | 0.0419 | 0.0158 | 0.0132 | 0.029  |
| 32 | No shock | Sal | 0.0143 | 0.0161 | 0.0304 | 0.0157 | 0.0142 | 0.0299 |
| 33 | No shock | K   | 0.0236 | 0.0213 | 0.0449 | 0.0175 | 0.0157 | 0.0332 |
| 34 | No shock | K   | 0.0136 | 0.0168 | 0.0304 | 0.0148 | 0.0123 | 0.0271 |
| 35 | No shock | K   | 0.0211 | 0.0167 | 0.0378 | 0.0145 | 0.0137 | 0.0282 |
| 36 | No shock | K   | 0.0137 | 0.0150 | 0.0287 | 0.0157 | 0.0102 | 0.0259 |
| 37 | No shock | K   | 0.1690 | 0.0166 | 0.1856 | 0.0183 | 0.0122 | 0.0305 |

**Stressed Mice**

| Region | Mode | Metabolite                  | Left PFC p value | Right PFC p value |
|--------|------|-----------------------------|------------------|-------------------|
|        |      | 1-Methylhistidine           | 0.0004           | 0.0032            |
|        |      | 11-Hydroxyandrosterone      | 0.0387           | 0.6853            |
|        |      | 13-HOTE                     | 0.0021           | 0.2243            |
|        |      | 19-Norandrosterone          | 0.0377           | 0.3451            |
|        |      | 2-Hexenoylcarnitine         | 0.9272           | 0.3088            |
|        |      | 2-Methoxyestradiol          | 0.2216           | 0.4853            |
|        |      | 3--5-Tetradecadiencarnitine | 0.9217           | 0.0457            |
|        |      | 3-5-Diiodothyronine         | 0.5416           | 0.1165            |
|        |      | 3-Aminoisobutanoic-acid     | 0.0000           | 0.0000            |
|        |      | 3-Methylcrotonylglycine     | 0.0212           | 0.0007            |
|        |      | 3-Methylhistidine           | 0.0023           | 0.0091            |
|        |      | 3-Methyluridine             | 0.1794           | 0.2124            |
|        |      | 5--Methylthioadenosine      | 0.0084           | 0.1503            |

|                                  |        |        |
|----------------------------------|--------|--------|
| 5-6-Dihydrouridine               | 0.6656 | 0.0929 |
| 5-Methylcytidine                 | 0.6431 | 0.3072 |
| 8-Hydroxyguanine                 | 0.1223 | 0.0251 |
| 9-12-Hexadecadienoylcarnitine    | 0.2105 | 0.0618 |
| 9-Decenoylcarnitine              | 0.4361 | 0.4361 |
| Acetoacetic-acid                 | 0.0000 | 0.0038 |
| Adenosine-triphosphate           | 0.0291 | 0.1557 |
| Alanyl-Proline                   | 0.0025 | 0.0180 |
| Aminoadipic-acid                 | 0.4701 | 0.5719 |
| Argininosuccinic-acid            | 0.0274 | 0.0424 |
| Asymmetric-dimethylarginine      | 0.0050 | 0.0363 |
| Carnosine                        | 0.0406 | 0.0337 |
| Citrulline                       | 0.0019 | 0.0050 |
| Cyclic-AMP                       | 0.3953 | 0.4846 |
| Cystathionine-ketimine           | 0.0310 | 0.2109 |
| Cytidine                         | 0.6916 | 0.6714 |
| D-Serine                         | 0.0011 | 0.0092 |
| D-Tryptophan                     | 0.0056 | 0.0129 |
| Deoxycytidine                    | 0.0165 | 0.0477 |
| Deoxyuridine                     | 0.0017 | 0.5072 |
| Dihydrothymine                   | 0.0054 | 0.0095 |
| Dodecanoylcarnitine              | 0.1678 | 0.0547 |
| dUDP                             | 0.0002 | 0.0003 |
| Erythronic-acid                  | 0.0096 | 0.0077 |
| Estradiol                        | 0.0027 | 0.1554 |
| Glucosylgalactosyl-hydroxylysine | 0.0050 | 0.0123 |
| Glycine                          | 0.0136 | 0.0061 |
| Glycylproline                    | 0.0028 | 0.0100 |
| Guanosine-diphosphate            | 0.6691 | 0.3997 |
| Guanosine-monophosphate          | 0.3745 | 0.0330 |
| Guanosine-triphosphate           | 0.0433 | 0.0544 |
| Hexanoylcarnitine                | 0.6060 | 0.0104 |
| Homo-L-arginine                  | 0.0485 | 0.0871 |
| Homocarnosine                    | 0.0069 | 0.0309 |
| Hypoxanthine                     | 0.0188 | 0.0096 |
| IMP                              | 0.0031 | 0.0218 |
| Inosine                          | 0.0127 | 0.0086 |

Positive

|                                           |        |        |
|-------------------------------------------|--------|--------|
| Isobutyryl-L-carnitine                    | 0.1272 | 0.0332 |
| Isoleucine                                | 0.0027 | 0.0105 |
| Isovalerylcarnitine                       | 0.5210 | 0.2595 |
| Isovalerylgucuronide                      | 0.0302 | 0.0336 |
| Ketoprofen-glucuronide                    | 0.0018 | 0.0019 |
| L-Allothreonine                           | 0.0023 | 0.0024 |
| L-Cystathionine                           | 0.2210 | 0.6509 |
| L-Cysteinylglycine-disulfide              | 0.0001 | 0.0010 |
| L-Homoserine                              | 0.0021 | 0.0289 |
| L-Octanoylcarnitine                       | 0.5390 | 0.0150 |
| L-Tyrosine                                | 0.0022 | 0.0059 |
| Leucine                                   | 0.0000 | 0.0046 |
| Malonylcarnitine                          | 0.0091 | 0.2928 |
| MET-ENKEPELIN                             | 0.1336 | 0.0035 |
| methionine                                | 0.0153 | 0.0830 |
| N--Phosphoguanidinoethyl methyl phosphate | 0.2092 | 0.1060 |
| N-Acetyl-L-methionine                     | 0.0325 | 0.0206 |
| N-Acetylcystathionine                     | 0.0758 | 0.0198 |
| N-Acetylglutamine                         | 0.0154 | 0.1573 |
| N-Acetylneuraminic-acid                   | 0.0045 | 0.2486 |
| N-acetyltryptophan                        | 0.0206 | 0.1415 |
| N-Acetylvaniilalanine                     | 0.1695 | 0.1871 |
| N-Formyl-L-methionine                     | 0.7312 | 0.0085 |
| N4-Acetylamino butanal                    | 0.0043 | 0.0518 |
| NAD                                       | 0.2233 | 0.0431 |
| NAD+                                      | 0.2640 | 0.0482 |
| NADH                                      | 0.0171 | 0.0150 |
| Nicotinamide                              | 0.0018 | 0.0597 |
| Nonanoylcarnitine                         | 0.0013 | 0.0198 |
| p-Cresol-glucuronide                      | 0.1964 | 0.1882 |
| Phenylalanine                             | 0.0064 | 0.0337 |
| Phenylpyruvic-acid                        | 0.0011 | 0.0031 |
| Pipecolic-acid                            | 0.0143 | 0.0630 |
| Progesterone                              | 0.1866 | 0.6845 |
| Proline-betaine                           | 0.1691 | 0.4450 |
| Prolylhydroxyproline                      | 0.0577 | 0.0509 |
| S-adenosyl-L-homoCysteine                 | 0.0246 | 0.1132 |

PFC

|                                |        |        |
|--------------------------------|--------|--------|
| S-Adenosylmethionine           | 0.1136 | 0.0061 |
| Suberylglycine                 | 0.1818 | 0.1991 |
| Succinyladenosine              | 0.0941 | 0.0405 |
| Taurocholic-acid               | 0.0033 | 0.0510 |
| Taurodeoxycholic-acid          | 0.0000 | 0.0006 |
| Testosterone                   | 0.0698 | 0.0089 |
| Thiamine-monophosphate         | 0.0128 | 0.0223 |
| Thyroxine                      | 0.1623 | 0.1869 |
| trans-2-Dodecenoylcarnitine    | 0.4636 | 0.0027 |
| Trimethylamine-N-oxide         | 0.4867 | 0.3878 |
| Uracil                         | 0.0840 | 0.0423 |
| Urolithin-C                    | 0.0410 | 0.7105 |
| Xanthine                       | 0.0392 | 0.0515 |
| Xanthurenic-acid               | 0.6185 | 0.0141 |
| (S)-Lactaldehyde               | 0.0553 | 0.0019 |
| 11b-Hydroxyprogesterone        | 0.0083 | 0.3228 |
| 12-13-DHOME                    | 0.0068 | 0.4807 |
| 1-Methylxanthine               | 0.6021 | 0.0000 |
| 2-Arachidonylglycerol          | 0.0127 | 0.3843 |
| 2-Hexenoylcarnitine            | 0.0308 | 0.5644 |
| 2-Hydroxyadipic-acid           | 0.2927 | 0.0028 |
| 2-Phenylpropionate             | 0.0569 | 0.6244 |
| 3-Chlorotyrosine               | 0.0009 | 0.2610 |
| 3-Dehydrocarnitine             | 0.0834 | 0.9597 |
| 3-Hydroxydodecanoic-acid       | 0.0022 | 0.6950 |
| 3-Hydroxytetradecanedioic-acid | 0.0037 | 0.9384 |
| 3-Sulfinoalanine               | 0.5418 | 0.6465 |
| 5-6-Dihydrouridine             | 0.6066 | 0.0001 |
| 5-Methylcytidine               | 0.1470 | 0.0123 |
| 5-Tetradecenoic-acid           | 0.0467 | 0.8897 |
| 6-Hydroxydaidzein              | 0.0013 | 0.7263 |
| Adenine                        | 0.3341 | 0.0044 |
| Adenosine                      | 0.3086 | 0.0045 |
| Adenosine-monophosphate        | 0.0318 | 0.0011 |
| Adenosine-triphosphate         | 0.0142 | 0.0164 |
| ADP                            | 0.5191 | 0.0143 |
| ADP-Glucose                    | 0.8177 | 0.0002 |

Negative

|                            |        |        |
|----------------------------|--------|--------|
| Aminoadipic-acid           | 0.1931 | 0.0000 |
| Butyrylcarnitine           | 0.0027 | 0.8076 |
| CDP                        | 0.7795 | 0.0271 |
| Cyclic-AMP                 | 0.7048 | 0.0044 |
| Cytidine                   | 0.1892 | 0.0205 |
| Cytidine-monophosphate     | 0.9227 | 0.0051 |
| Cytosine                   | 0.2507 | 0.0030 |
| D-Alanine                  | 0.0178 | 0.0000 |
| Dihydrothymine             | 0.0200 | 0.0001 |
| Dihydroxyacetone-phosphate | 0.4940 | 0.0052 |
| D-Lysine                   | 0.6999 | 0.0077 |
| Dodecanedioic-acid         | 0.0021 | 0.9179 |
| Dodecanoic-acid            | 0.0447 | 0.8702 |
| D-Serine                   | 0.1125 | 0.0000 |
| D-Tryptophan               | 0.0220 | 0.2810 |
| Enkephalin-L               | 0.1345 | 0.0007 |
| FAD                        | 0.3991 | 0.0503 |
| Fructose-1-6-bisphosphate  | 0.1661 | 0.0415 |
| Gamma-Aminobutyric-acid    | 0.5252 | 0.0000 |
| Gamma-Glutamyl-Glutamine   | 0.0651 | 0.3903 |
| Glucosamine-phosphate      | 0.0037 | 0.0044 |
| glutathione                | 0.4697 | 0.0422 |
| Glyceric-acid              | 0.6690 | 0.0000 |
| Glycerol-3-phosphate       | 0.4140 | 0.0071 |
| GMP                        | 0.2672 | 0.0225 |
| Guanosine-diphosphate      | 0.0445 | 0.0004 |
| Guanosine-triphosphate     | 0.0194 | 0.0041 |
| Hexanoylcarnitine          | 0.0339 | 0.8636 |
| Homocarnosine              | 0.8750 | 0.0000 |
| Homocitrulline             | 0.0019 | 0.3921 |
| Hydroxyhexanoycarnitine    | 0.0037 | 0.2976 |
| Hydroxyoctanoic-acid       | 0.0048 | 0.6490 |
| Hydroxypyruvic-acid        | 0.0214 | 0.0003 |
| IMP                        | 0.0168 | 0.6032 |
| Inosine                    | 0.0416 | 0.4426 |
| Isovaleric-acid            | 0.5087 | 0.0045 |
| L-2-Hydroxyglutaric-acid   | 0.3218 | 0.0096 |

|                         |        |        |
|-------------------------|--------|--------|
| L-3-Phenyllactic-acid   | 0.8600 | 0.0032 |
| L-Acetylcarnitine       | 0.0060 | 0.7490 |
| L-Carnitine             | 0.2011 | 0.0038 |
| L-Glutamic-acid         | 0.3732 | 0.0000 |
| Linoleic-acid           | 0.0115 | 0.5766 |
| L-Lactic-acid           | 0.0348 | 0.0081 |
| L-Malic-acid            | 0.0373 | 0.3364 |
| L-Tyrosine              | 0.0077 | 0.7414 |
| Malonate                | 0.0214 | 0.0003 |
| Methionine              | 0.2286 | 0.0330 |
| Methylmalonic-acid      | 0.0426 | 0.0032 |
| N-Acetylglutamine       | 0.0694 | 0.6250 |
| NAD+                    | 0.0739 | 0.0043 |
| NADH                    | 0.0125 | 0.0021 |
| N-Formyl-L-methionine   | 0.0092 | 0.0496 |
| Nicotinamide-ribose     | 0.1333 | 0.0083 |
| Octulose-phosphate      | 0.0093 | 0.0043 |
| Oleic-acid              | 0.0317 | 0.1234 |
| O-Phosphoethanolamine   | 0.3872 | 0.0000 |
| Oxidized-glutathione    | 0.1284 | 0.0001 |
| Oxoadipic-acid          | 0.0041 | 0.1049 |
| Oxoglutaric-acid        | 0.0274 | 0.0001 |
| Palmitic-acid           | 0.0261 | 0.5972 |
| Palmitoleic-acid        | 0.0024 | 0.6231 |
| p-Cresol-sulfate        | 0.0018 | 0.4236 |
| Phenylalanine           | 0.1502 | 0.0007 |
| Phenylpropionylglycine  | 0.0071 | 0.3014 |
| Phosphoenolpyruvic-acid | 0.0404 | 0.1528 |
| Propionylcarnitine      | 0.0018 | 0.2549 |
| Propionylglycine        | 0.2466 | 0.0000 |
| Ribothymidine           | 0.0000 | 0.1674 |
| Sarcosine               | 0.1092 | 0.0251 |
| Sphingosine-1-phosphate | 0.9527 | 0.0042 |
| Stearic-acid            | 0.0727 | 0.2743 |
| Taurine                 | 0.8738 | 0.0000 |
| Testosterone-sulfate    | 0.0009 | 0.9284 |
| Tetradecanedioic-acid   | 0.0035 | 0.7318 |

|                                         |        |        |
|-----------------------------------------|--------|--------|
| Thiamine-pyrophosphate                  | 0.2380 | 0.0001 |
| Thymine                                 | 0.0016 | 0.0733 |
| Uracil                                  | 0.2300 | 0.5986 |
| Uric-acid                               | 0.5679 | 0.0024 |
| Uridine                                 | 0.1539 | 0.0332 |
| Uridine-diphosphate-glucose             | 0.3417 | 0.0100 |
| Uridine-diphosphate-N-acetylglucosamine | 0.0536 | 0.0170 |
| Uridine-triphosphate                    | 0.0085 | 0.0202 |
| Urolithin-C                             | 0.0011 | 0.2275 |
| Valeric-acid                            | 0.2847 | 0.0003 |
| Valerylcarnitine                        | 0.0133 | 0.9297 |
| Xanthine                                | 0.0661 | 0.6403 |
| Xanthosine-5-phosphate                  | 0.3232 | 0.0042 |

| Region | Mode | Metabolite                    | Left HPC p value | Right HPC p value |
|--------|------|-------------------------------|------------------|-------------------|
|        |      | 1-Methylhistidine             | 0.0416           | 0.1744            |
|        |      | 11-Hydroxyandrosterone        | 0.5556           | 0.5952            |
|        |      | 13-HOTE                       | 0.0421           | 0.0242            |
|        |      | 19-Norandrosterone            | 0.8228           | 0.6511            |
|        |      | 2-Hexenoylcarnitine           | 0.6606           | 0.9663            |
|        |      | 2-Methoxyestradiol            | 0.4757           | 0.9931            |
|        |      | 3--5-Tetradecadiencarnitine   | 0.0588           | 0.1658            |
|        |      | 3-5-Diiodothyronine           | 0.3726           | 0.6775            |
|        |      | 3-Aminoisobutanoic-acid       | 0.0345           | 0.0605            |
|        |      | 3-Methylcrotonylglycine       | 0.0648           | 0.7030            |
|        |      | 3-Methylhistidine             | 0.0127           | 0.0598            |
|        |      | 3-Methyluridine               | 0.2461           | 0.8378            |
|        |      | 5--Methylthioadenosine        | 0.6837           | 0.0074            |
|        |      | 5-6-Dihydrouridine            | 0.0022           | 0.0030            |
|        |      | 5-Methylcytidine              | 0.0540           | 0.3678            |
|        |      | 8-Hydroxyguanine              | 0.0152           | 0.0405            |
|        |      | 9-12-Hexadecadienoylcarnitine | 0.0984           | 0.7821            |
|        |      | 9-Decenoylcarnitine           | 0.0880           | 0.1751            |
|        |      | Acetoacetic-acid              | 0.7095           | 0.8305            |
|        |      | Adenosine-triphosphate        | 0.0704           | 0.1266            |
|        |      | Alanyl-Proline                | 0.0296           | 0.1327            |
|        |      | Aminoadipic-acid              | 0.0690           | 0.2016            |

Positive

|                                  |        |        |
|----------------------------------|--------|--------|
| Argininosuccinic-acid            | 0.3259 | 0.4922 |
| Asymmetric-dimethylarginine      | 0.8378 | 0.6567 |
| Carnosine                        | 0.6346 | 0.8656 |
| Citrulline                       | 0.1826 | 0.5655 |
| Cyclic-AMP                       | 0.0875 | 0.1405 |
| Cystathionine-ketimine           | 0.0443 | 0.8138 |
| Cytidine                         | 0.1426 | 0.2717 |
| D-Serine                         | 0.1869 | 0.8959 |
| D-Tryptophan                     | 0.2462 | 0.4534 |
| Deoxycytidine                    | 0.4804 | 0.3590 |
| Deoxyuridine                     | 0.2250 | 0.6074 |
| Dihydrothymine                   | 0.0808 | 0.1165 |
| Dodecanoylcarnitine              | 0.4180 | 0.8433 |
| dUDP                             | 0.0029 | 0.0051 |
| Erythronic-acid                  | 0.0185 | 0.1153 |
| Estradiol                        | 0.4064 | 0.9947 |
| Glucosylgalactosyl-hydroxylysine | 0.2679 | 0.1711 |
| Glycine                          | 0.2668 | 0.8485 |
| Glycylproline                    | 0.0892 | 0.2478 |
| Guanosine-diphosphate            | 0.0363 | 0.0685 |
| Guanosine-monophosphate          | 0.6696 | 0.2641 |
| Guanosine-triphosphate           | 0.0319 | 0.0736 |
| Hexanoylcarnitine                | 0.0342 | 0.0942 |
| Homo-L-arginine                  | 0.1317 | 0.4405 |
| Homocarnosine                    | 0.9057 | 0.3667 |
| Hypoxanthine                     | 0.0287 | 0.1542 |
| IMP                              | 0.0134 | 0.0204 |
| Inosine                          | 0.0146 | 0.0621 |
| Isobutyryl-L-carnitine           | 0.1058 | 0.0577 |
| Isoleucine                       | 0.1750 | 0.4787 |
| Isovalerylcarnitine              | 0.1611 | 0.3156 |
| Isovalerylglucuronide            | 0.2864 | 0.8821 |
| Ketoprofen-glucuronide           | 0.0010 | 0.0564 |
| L-Allothreonine                  | 0.1602 | 0.8601 |
| L-Cystathionine                  | 0.0878 | 0.0344 |
| L-Cysteinylglycine-disulfide     | 0.3245 | 0.4862 |
| L-Homoserine                     | 0.8507 | 0.1369 |

|                                           |        |        |
|-------------------------------------------|--------|--------|
| L-Octanoylcarnitine                       | 0.0014 | 0.0234 |
| L-Tyrosine                                | 0.0522 | 0.2079 |
| Leucine                                   | 0.1488 | 0.2082 |
| Malonylcarnitine                          | 0.9241 | 0.8249 |
| MET-ENKEPELIN                             | 0.0795 | 0.7499 |
| Methionine                                | 0.7775 | 0.8700 |
| N--Phosphoguanidinoethyl methyl phosphate | 0.2701 | 0.4484 |
| N-Acetyl-L-methionine                     | 0.3115 | 0.9274 |
| N-Acetylcystathionine                     | 0.2693 | 0.1513 |
| N-Acetylglutamine                         | 0.5036 | 0.9774 |
| N-Acetylneuraminic-acid                   | 0.6110 | 0.5381 |
| N-acetyltryptophan                        | 0.0594 | 0.1616 |
| N-Acetylvanilalanine                      | 0.3890 | 0.4706 |
| N-Formyl-L-methionine                     | 0.0885 | 0.7685 |
| N4-Acetylaminobutanal                     | 0.6462 | 0.6132 |
| NAD                                       | 0.0278 | 0.0430 |
| NAD+                                      | 0.0301 | 0.0461 |
| NADH                                      | 0.0075 | 0.0877 |
| Nicotinamide                              | 0.0743 | 0.0159 |
| Nonanoylcarnitine                         | 0.1313 | 0.0383 |
| p-Cresol-glucuronide                      | 0.6377 | 0.8879 |
| Phenylalanine                             | 0.7497 | 0.8954 |
| Phenylpyruvic-acid                        | 0.0685 | 0.2399 |
| Pipecolic-acid                            | 0.9596 | 0.7845 |
| Progesterone                              | 0.2279 | 0.3776 |
| Proline-betaine                           | 0.2189 | 0.4441 |
| Prolyhydroxyproline                       | 0.2644 | 0.6170 |
| S-adenosyl-L-homoCysteine                 | 0.2590 | 0.5549 |
| S-Adenosylmethionine                      | 0.1013 | 0.0063 |
| Suberylglycine                            | 0.8441 | 0.1883 |
| Succinyladenosine                         | 0.1831 | 0.4121 |
| Taurocholic-acid                          | 0.7990 | 0.7520 |
| Taurodeoxycholic-acid                     | 0.5248 | 0.1932 |
| Testosterone                              | 0.0018 | 0.0128 |
| Thiamine-monophosphate                    | 0.0608 | 0.0215 |
| Thyroxine                                 | 0.5634 | 0.4695 |
| trans-2-Dodecenoylcarnitine               | 0.0218 | 0.1847 |

HPC

|                                |               |               |
|--------------------------------|---------------|---------------|
| Trimethylamine-N-oxide         | 0.4533        | 0.0275        |
| Uracil                         | 0.0917        | 0.4630        |
| Urolithin-C                    | 0.5196        | 0.2006        |
| Xanthine                       | 0.0628        | 0.3702        |
| Xanthurenic-acid               | 0.3880        | 0.9391        |
| <b>(S)-Lactaldehyde</b>        | <b>0.0064</b> | <b>0.0042</b> |
| 11b-Hydroxyprogesterone        | 0.3488        | 0.5851        |
| 12-13-DHOME                    | 0.4395        | 0.0008        |
| 1-Methylxanthine               | 0.3016        | 0.2375        |
| 2-Arachidonylglycerol          | 0.2196        | 0.0671        |
| 2-Hexenoylcarnitine            | 0.2634        | 0.0004        |
| 2-Hydroxyadipic-acid           | 0.8925        | 0.0000        |
| 2-Phenylpropionate             | 0.7219        | 0.3278        |
| 3-Chlorotyrosine               | 0.7517        | 0.0182        |
| 3-Dehydrocarnitine             | 0.6270        | 0.0066        |
| 3-Hydroxydodecanoic-acid       | 0.7606        | 0.0327        |
| 3-Hydroxytetradecanedioic-acid | 0.2857        | 0.0021        |
| <b>3-Sulfinoalanine</b>        | <b>0.0589</b> | <b>0.0003</b> |
| 5-6-Dihydrouridine             | 0.1574        | 0.0085        |
| 5-Methylcytidine               | 0.0284        | 0.1033        |
| 5-Tetradecenoic-acid           | 0.1464        | 0.3673        |
| 6-Hydroxydaidzein              | 0.9145        | 0.0097        |
| Adenine                        | 0.0130        | 0.0550        |
| Adenosine                      | 0.0128        | 0.0612        |
| <b>Adenosine-monophosphate</b> | <b>0.0150</b> | <b>0.0258</b> |
| Adenosine-triphosphate         | 0.0747        | 0.0670        |
| <b>ADP</b>                     | <b>0.0247</b> | <b>0.0051</b> |
| ADP-Glucose                    | 0.2876        | 0.0094        |
| Aminoadipic-acid               | 0.1148        | 0.0009        |
| Butyrylcarnitine               | 0.4150        | 0.0148        |
| <b>CDP</b>                     | <b>0.0327</b> | <b>0.0073</b> |
| Cyclic-AMP                     | 0.0554        | 0.0227        |
| Cytidine                       | 0.0969        | 0.0899        |
| Cytidine-monophosphate         | 0.7747        | 0.1819        |
| Cytosine                       | 0.0670        | 0.0331        |
| <b>D-Alanine</b>               | <b>0.0025</b> | <b>0.0000</b> |
| Dihydrothymine                 | 0.4422        | 0.0076        |

Negative

|                            |        |        |
|----------------------------|--------|--------|
| Dihydroxyacetone-phosphate | 0.3423 | 0.0431 |
| D-Lysine                   | 0.1333 | 0.0004 |
| Dodecanedioic-acid         | 0.3113 | 0.0040 |
| Dodecanoic-acid            | 0.4542 | 0.9220 |
| D-Serine                   | 0.2479 | 0.0008 |
| D-Tryptophan               | 0.4039 | 0.1403 |
| Enkephalin-L               | 0.0776 | 0.0319 |
| FAD                        | 0.6285 | 0.0449 |
| Fructose-1-6-bisphosphate  | 0.5368 | 0.1262 |
| Gamma-Aminobutyric-acid    | 0.0042 | 0.0001 |
| Gamma-Glutamyl-Glutamine   | 0.1732 | 0.3545 |
| Glucosamine-phosphate      | 0.9447 | 0.0011 |
| glutathione                | 0.4302 | 0.2151 |
| Glyceric-acid              | 0.9877 | 0.0015 |
| Glycerol-3-phosphate       | 0.0328 | 0.0855 |
| GMP                        | 0.5653 | 0.2310 |
| Guanosine-diphosphate      | 0.0169 | 0.0099 |
| Guanosine-triphosphate     | 0.0475 | 0.0131 |
| Hexanoylcarnitine          | 0.7981 | 0.0055 |
| Homocarnosine              | 0.2542 | 0.2154 |
| Homocitrulline             | 0.0975 | 0.0036 |
| Hydroxyhexanoylcarnitine   | 0.5054 | 0.9992 |
| Hydroxyoctanoic-acid       | 0.1974 | 0.0429 |
| Hydroxypyruvic-acid        | 0.8104 | 0.0068 |
| IMP                        | 0.0172 | 0.1582 |
| Inosine                    | 0.0899 | 0.9878 |
| Isovaleric-acid            | 0.2710 | 0.2508 |
| L-2-Hydroxyglutaric-acid   | 0.0346 | 0.0060 |
| L-3-Phenyllactic-acid      | 0.2768 | 0.0227 |
| L-Acetylcarnitine          | 0.4143 | 0.5135 |
| L-Carnitine                | 0.4812 | 0.1800 |
| L-Glutamic-acid            | 0.0100 | 0.0001 |
| Linoleic-acid              | 0.1818 | 0.8592 |
| L-Lactic-acid              | 0.1026 | 0.0003 |
| L-Malic-acid               | 0.6960 | 0.0005 |
| L-Tyrosine                 | 0.0993 | 0.5132 |
| Malonate                   | 0.8104 | 0.0068 |

|                                         |        |        |
|-----------------------------------------|--------|--------|
| Methionine                              | 0.8526 | 0.0036 |
| Methylmalonic-acid                      | 0.0070 | 0.0051 |
| N-Acetylglutamine                       | 0.1734 | 0.0489 |
| NAD+                                    | 0.0360 | 0.0356 |
| NADH                                    | 0.0092 | 0.0830 |
| N-Formyl-L-methionine                   | 0.4225 | 0.0019 |
| Nicotinamide-ribotide                   | 0.3209 | 0.0089 |
| Octulose-phosphate                      | 0.0722 | 0.0685 |
| Oleic-acid                              | 0.3155 | 0.0284 |
| O-Phosphoethanolamine                   | 0.0097 | 0.0043 |
| Oxidized-glutathione                    | 0.1527 | 0.0094 |
| Oxoadipic-acid                          | 0.7109 | 0.0104 |
| Oxoglutaric-acid                        | 0.4281 | 0.0126 |
| Palmitic-acid                           | 0.2218 | 0.0018 |
| Palmitoleic-acid                        | 0.2921 | 0.9979 |
| p-Cresol-sulfate                        | 0.6283 | 0.1339 |
| Phenylalanine                           | 0.9799 | 0.0041 |
| Phenylpropionylglycine                  | 0.5040 | 0.0057 |
| Phosphoenolpyruvic-acid                 | 0.0974 | 0.0335 |
| Propionylcarnitine                      | 0.4493 | 0.0091 |
| Propionylglycine                        | 0.2793 | 0.0001 |
| Ribothymidine                           | 0.0099 | 0.9998 |
| Sarcosine                               | 0.4234 | 0.0000 |
| Sphingosine-1-phosphate                 | 0.4054 | 0.0005 |
| Stearic-acid                            | 0.0657 | 0.0000 |
| Taurine                                 | 0.0022 | 0.0000 |
| Testosterone-sulfate                    | 0.2940 | 0.0078 |
| Tetradecanedioic-acid                   | 0.1047 | 0.0024 |
| Thiamine-pyrophosphate                  | 0.2377 | 0.0688 |
| Thymine                                 | 0.4149 | 0.9098 |
| Uracil                                  | 0.2814 | 0.5391 |
| Uric-acid                               | 0.5572 | 0.0086 |
| Uridine                                 | 0.7700 | 0.1794 |
| Uridine-diphosphate-glucose             | 0.0561 | 0.0606 |
| Uridine-diphosphate-N-acetylglucosamine | 0.2481 | 0.3630 |
| Uridine-triphosphate                    | 0.1983 | 0.1072 |
| Urolithin-C                             | 0.8878 | 0.0469 |

|                 |             |                               |                |        |
|-----------------|-------------|-------------------------------|----------------|--------|
|                 |             | Valeric-acid                  | 0.1203         | 0.0099 |
|                 |             | Valerylcarnitine              | 0.2109         | 0.0014 |
|                 |             | Xanthine                      | 0.0667         | 0.8798 |
|                 |             | Xanthosine-5-phosphate        | 0.0218         | 0.0671 |
| <b>Region</b>   | <b>Mode</b> | <b>Metabolite</b>             | <b>p value</b> |        |
| Plasma          | N/A         | (R)-lipoic acid               | 0.0298         | -      |
|                 |             | 2-Methylcitric acid           | 0.0003         | -      |
|                 |             | 3-Methyluridine               | 0.0043         | -      |
|                 |             | 3-Phosphoglyceric acid        | 0.0001         | -      |
|                 |             | 4-Methylcatechol              | 0.0002         | -      |
|                 |             | 5-6-Dihydrouridine            | 0.0083         | -      |
|                 |             | 5-Hydroxy-L-tryptophan        | 0.0086         | -      |
|                 |             | Adenine                       | 0.0031         | -      |
|                 |             | Adenosine monophosphate       | 0.0057         | -      |
|                 |             | Adenosine triphosphate        | 0.0103         | -      |
|                 |             | Allantoin                     | 0.0301         | -      |
|                 |             | Argininic acid                | 0.0470         | -      |
|                 |             | Cysteineglutathione disulfide | 0.0041         | -      |
|                 |             | Cytidine monophosphate        | 0.0007         | -      |
|                 |             | D-Aspartic acid               | 0.0032         | -      |
|                 |             | Dihydrothymine                | 0.0058         | -      |
|                 |             | DL-2-Aminooctanoic acid       | 0.0003         | -      |
|                 |             | D-Ribose 5-phosphate          | 0.0004         | -      |
|                 |             | D-Ribulose 5-phosphate        | 0.0005         | -      |
|                 |             | D-Serine                      | 0.0178         | -      |
|                 |             | Erythronic acid               | 0.0469         | -      |
|                 |             | Gamma-Aminobutyric acid       | 0.0194         | -      |
|                 |             | Glycerol 3-phosphate          | 0.0213         | -      |
|                 |             | Guanosine diphosphate         | 0.0236         | -      |
|                 |             | Guanosine monophosphate       | 0.0103         | -      |
|                 |             | Homocarnosine                 | 0.0072         | -      |
|                 |             | Hypotaurine                   | 0.0527         | -      |
|                 |             | Hypoxanthine                  | 0.0545         | -      |
|                 |             | Inosine                       | 0.0511         | -      |
|                 |             | L-Cystathionine               | 0.0044         | -      |
| L-Glutamic acid | 0.0223      | -                             |                |        |
| L-Malic acid    | 0.0005      | -                             |                |        |

|                              |        |   |
|------------------------------|--------|---|
| Malonylcarnitine             | 0.0020 | - |
| Methylmalonylcarnitine       | 0.0045 | - |
| N-Acetylglutamic acid        | 0.0084 | - |
| N-Acetyl-L-tyrosine          | 0.0438 | - |
| N-Acetylneuraminic acid      | 0.0399 | - |
| Nicotinamide N-oxide         | 0.0084 | - |
| Octulose phosphate           | 0.0275 | - |
| O-Phosphoethanolamine        | 0.0012 | - |
| Oxidized glutathione         | 0.0260 | - |
| Pantothenate                 | 0.0539 | - |
| Phenylpyruvic acid           | 0.0107 | - |
| Phosphoenolpyruvic acid      | 0.0390 | - |
| Phosphoribosyl pyrophosphate | 0.0008 | - |
| S-Adenosylmethionine         | 0.0476 | - |
| Thiamine pyrophosphate       | 0.0039 | - |
| Threonic acid                | 0.0206 | - |
| trans-Aconitic acid          | 0.0081 | - |
| Tryptophanamide              | 0.0002 | - |
| Uridine 5--diphosphate       | 0.0002 | - |
| Uridine 5--monophosphate     | 0.0010 | - |
| Uridine diphosphate glucose  | 0.0017 | - |

**Non-Stressed Mice**

| Region | Purine or Pyrimidine | Metabolite              | Left PFC p value | Right PFC p value |
|--------|----------------------|-------------------------|------------------|-------------------|
| PFC    | Purines              | Adenosine monophosphate | 0.2928           | 0.4380            |
|        |                      | Adenosine triphosphate  | 0.6485           | 0.5829            |
|        |                      | Guanosine diphosphate   | 0.8918           | 0.3221            |
|        |                      | Guanosine triphosphate  | 0.0500           | 0.0689            |
|        |                      | Hypoxanthine            | 0.0339           | 0.9303            |
|        |                      | Inosine                 | 0.0458           | 0.6518            |
|        |                      | Inosine monophosphate   | 0.4642           | 0.1102            |
|        | Pyrimidines          | dUDP                    | 0.4351           | 0.0853            |
|        |                      | 3-Aminoisobutanoic acid | 0.0029           | 0.2381            |
|        |                      | Dihydrothymine          | 0.7843           | 0.7012            |
|        |                      | Deoxycytidine           | 0.9995           | 0.2264            |
|        |                      | Uridine triphosphate    | 0.6823           | 0.1330            |

| Region | Purine or Pyrimidine | Metabolite                   | Left HPC p value | Right HPC p value |
|--------|----------------------|------------------------------|------------------|-------------------|
| HPC    | Purines              | Adenosine-diphosphate        | 0.2328           | 0.9157            |
|        |                      | Adenosine-monophosphate      | 0.9061           | 0.6704            |
|        |                      | Guanosine-diphosphate        | 0.9460           | 0.2914            |
|        |                      | Guanosine-triphosphate       | 0.2320           | 0.1292            |
|        |                      | Inosine-monophosphate        | 0.9894           | 0.0222            |
|        | Pyrimidines          | Deoxyuridine-diphosphate     | 0.7517           | 0.0049            |
|        |                      | 5-6-Dihydrouridine           | 0.4247           | 0.4329            |
|        |                      | Cytidine-diphosphate         | 0.5557           | 0.4807            |
| Region | Purine or Pyrimidine | Metabolite                   | p value          |                   |
| Plasma | Purines              | Adenine                      | 0.5871           | -                 |
|        |                      | Adenosine monophosphate      | 0.8697           | -                 |
|        |                      | Adenosine triphosphate       | 0.7528           | -                 |
|        |                      | D-Ribose-5-phosphate         | 0.6598           | -                 |
|        |                      | D-Ribulose-5-phosphate       | 0.1537           | -                 |
|        |                      | Guanosine monophosphate      | 0.2434           | -                 |
|        |                      | Guanosine diphosphate        | 0.4332           | -                 |
|        |                      | Hypoxanthine                 | 0.4893           | -                 |
|        |                      | Inosine                      | 0.1620           | -                 |
|        |                      | Phosphoribosyl pyrophosphate | 0.1417           | -                 |
|        | Pyrimidines          | 5-6-Dihydrouridine           | 0.6810           | -                 |
|        |                      | Cytidine monophosphate       | 0.8047           | -                 |
|        |                      | Dihydrothymine               | 0.4706           | -                 |
|        |                      | Uridine 5'-monophosphate     | 0.1286           | -                 |
|        |                      | Uridine 5'-diphosphate       | 0.3336           | -                 |
