# Supplementary material
Source: PubMed Central journal article supplement (PMC6046049)
Supplement: 41386_2018_43_MOESM8_ESM.pdf [file 41386_2018_43_MOESM8_ESM.pdf]

**Supplemental Table 2.**

| <b>Common Name</b>       | <b>Abbreviation</b> | <b>Class</b>                                   |
|--------------------------|---------------------|------------------------------------------------|
| Adenosine monophosphate  | AMP                 | Purine ribonucleoside monophosphates           |
| Deoxyuridine-diphosphate | dUDP                | Pyrimidine 2'-deoxyribonucleoside diphosphates |
| Guanosine diphosphate    | GDP                 | Purine ribonucleoside diphosphates             |
| Guanosine triphosphate   | GTP                 | Purine ribonucleoside triphosphates            |
| Inosine monophosphate    | IMP                 | Purine ribonucleoside monophosphates           |
| Methylmalonic-acid       | -                   | Dicarboxylic acids and derivatives             |
