# Supplementary material
Source: PubMed Central journal article supplement (PMC6046049)
Supplement: 41386_2018_43_MOESM9_ESM.pdf [file 41386_2018_43_MOESM9_ESM.pdf]

**Supplemental Table 3.**

| Name                    | Abbreviation | Sample | Change   | Group                    | Excitatory / Inhibitory | Receptor                              | Notes                                                                                                       |
|-------------------------|--------------|--------|----------|--------------------------|-------------------------|---------------------------------------|-------------------------------------------------------------------------------------------------------------|
| D-Alanine               | Ala          | HPC    | Increase | CFC                      | Inhibitory              | Glycine receptor                      | Has been shown to increase following anti-depressant treatment.                                             |
| D-Serine                | Ser          | PFC    | Decrease | CFC                      | Excitatory              | NDMA receptors and glycine receptors  | Coagonist at the glycine site of NDMA receptors.                                                            |
| Gamma-aminobutyric acid | GABA         | HPC    | Increase | CFC                      | Inhibitory              | GABAA receptors and GABAA-p receptors | Low GABA levels have been linked to depression.                                                             |
| Glycine                 | Gly          | PFC    | Decrease | CFC                      | Inhibitory / Excitatory | NDMA receptors and glycine receptors  | Often released with GABA.                                                                                   |
| L-Glutamic acid         | Glu          | HPC    | Increase | CFC                      | Excitatory              | NDMA receptors and AMPA receptors     | Precursor to GABA as well.                                                                                  |
| L-Tyrosine              | Tyr          | PFC    | Decrease | CFC                      | Excitatory              | CaSR                                  | Precursor to neurotransmitters such as tyrosine, dopamine, norepinephrine, and epinephrine.                 |
| O-Phosphoethanolamine*  | PE           | HPC    | Increase | CFC                      | -                       | -                                     | Shows strong structural similarity to GABA. Co-released with taurine.                                       |
| Phenylalanine           | Phe          | PFC    | Decrease | CFC                      | Excitatory              | CaSR                                  | Precursor to neurotransmitters such as tyrosine, dopamine, norepinephrine, and epinephrine.                 |
| Taurine                 | Tau          | HPC    | Increase | CFC and context exposure | Inhibitory              | Glycine receptor                      | Structural resemblance with GABA.                                                                           |
| 5-Hydroxy-L-tryptophan  | 5-HTP        | Plasma | Increase | CFC                      | -                       | -                                     | Immediate precursor to serotonin (5-HT), which elevates mood.                                               |
| D-Serine                | Ser          | Plasma | Decrease | CFC                      | Excitatory              | NDMA receptors and glycine receptors  | Enhances glutamatergic signalling via NMDARs.                                                               |
| Gamma-aminobutyric acid | GABA         | Plasma | Decrease | CFC                      | Inhibitory              | GABAA receptors and GABAA-p receptors | Homeostatic balance of GABAergic inhibition is essential for controlling excitatory neurotransmission.      |
| L-Glutamic acid         | Glu          | Plasma | Decrease | CFC                      | Excitatory              | NDMA receptors and AMPA receptors     | Precursor to glutamine, which stabilizes the immune system in times of stress.                              |
| N-Acetyl-L-tyrosine     | NALT         | Plasma | Decrease | CFC                      | -                       | -                                     | Precursor to tyrosine, which converts to norepinephrine (NE) and dopamine (DA), enhancers of mood.          |
| O-Phosphoethanolamine*  | PE           | Plasma | Increase | CFC                      | -                       | -                                     | Inhibits mitochondrial dysfunction, suggested to be involved in the pathophysiology of affective illnesses. |

\*PE has not been shown to be a potent neurotransmitter yet, but has structural similarity to GABA.
