# Supplementary material
Source: PubMed Central journal article supplement (PMC6046049)

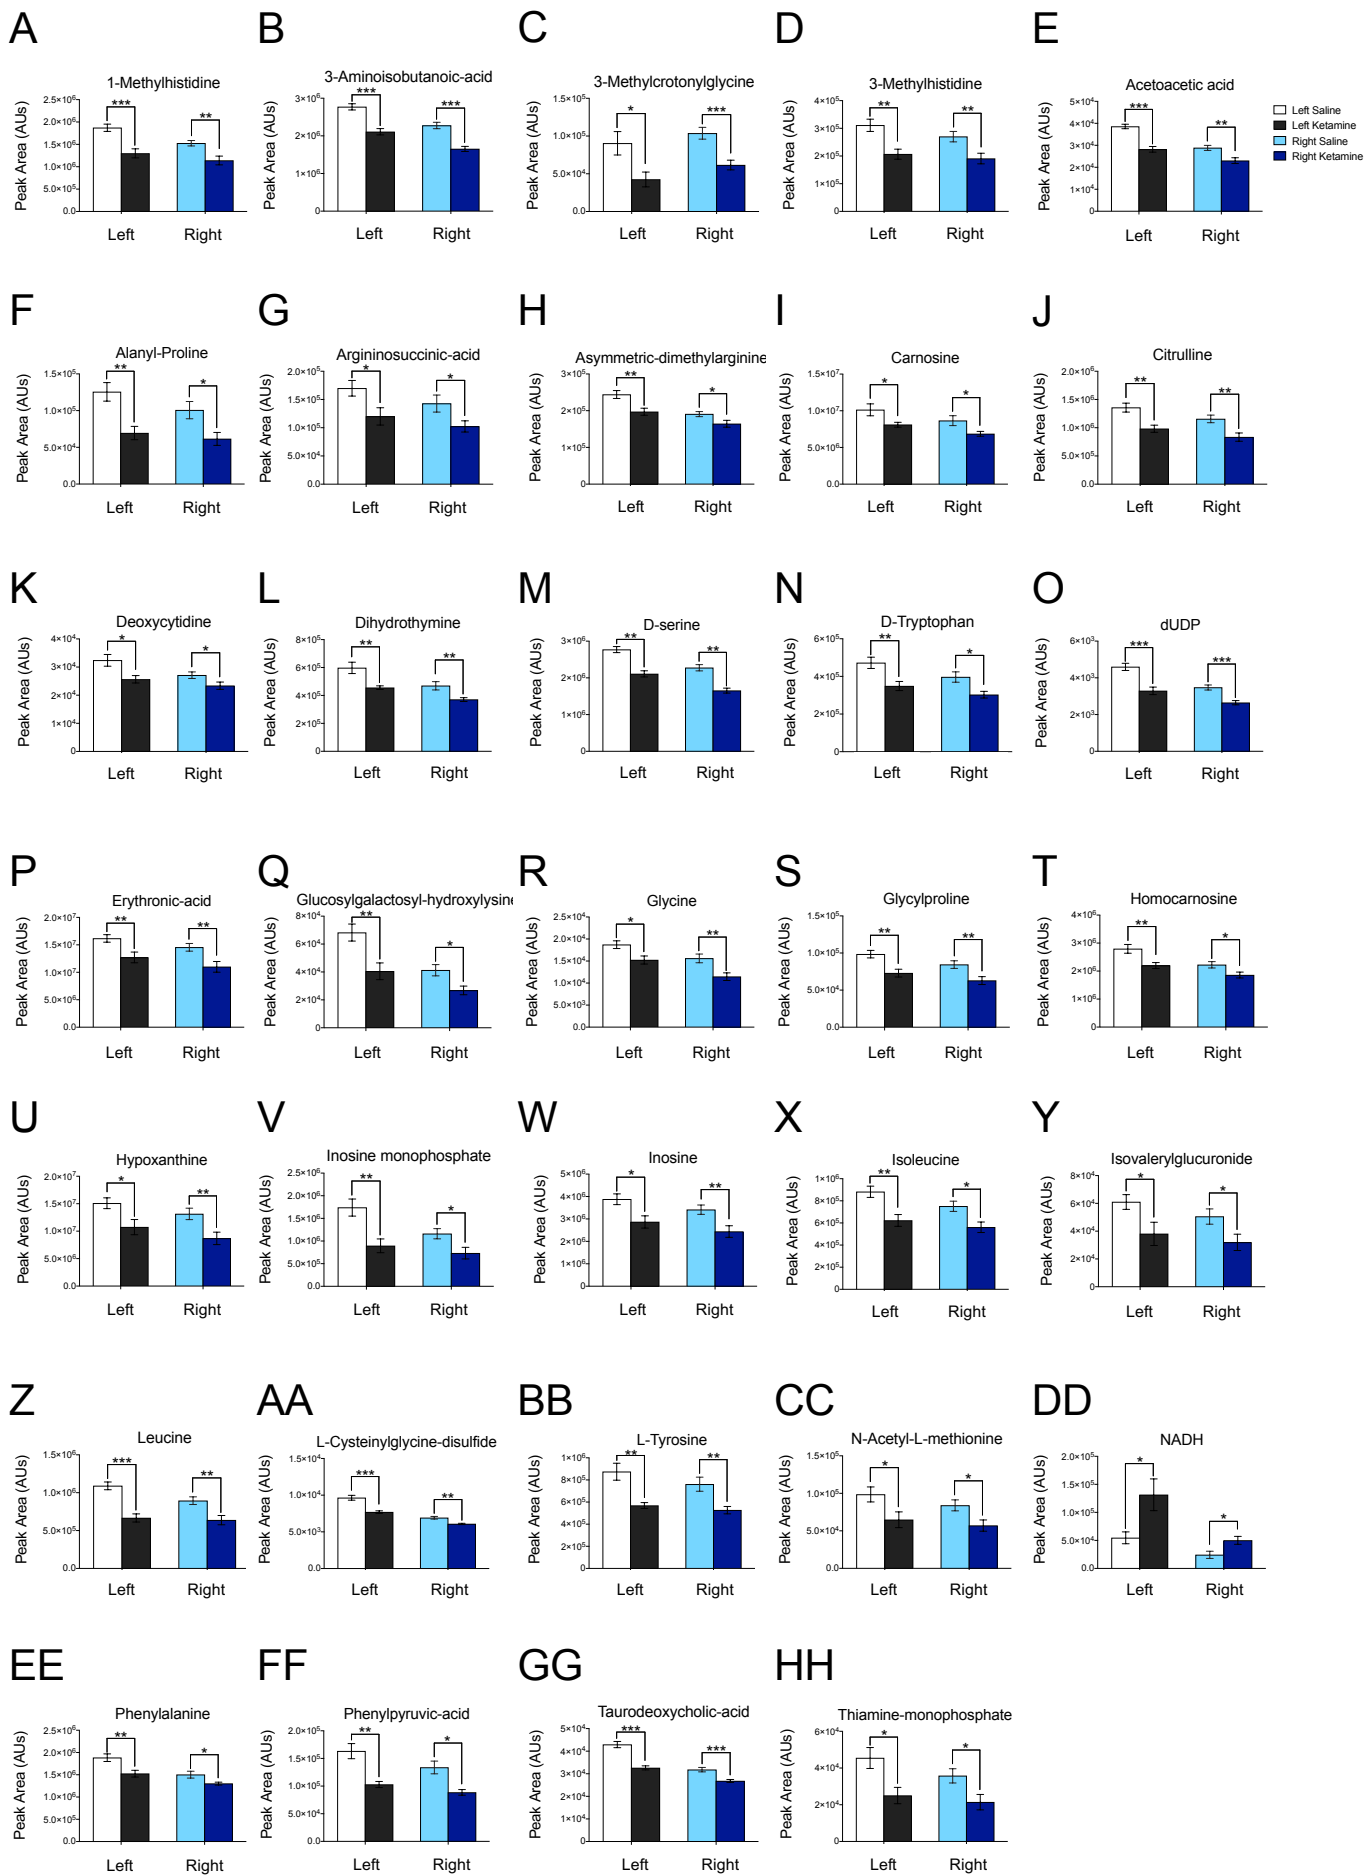

Supplement: 41386_2018_43_MOESM2_ESM.pdf [file 41386_2018_43_MOESM2_ESM.pdf]

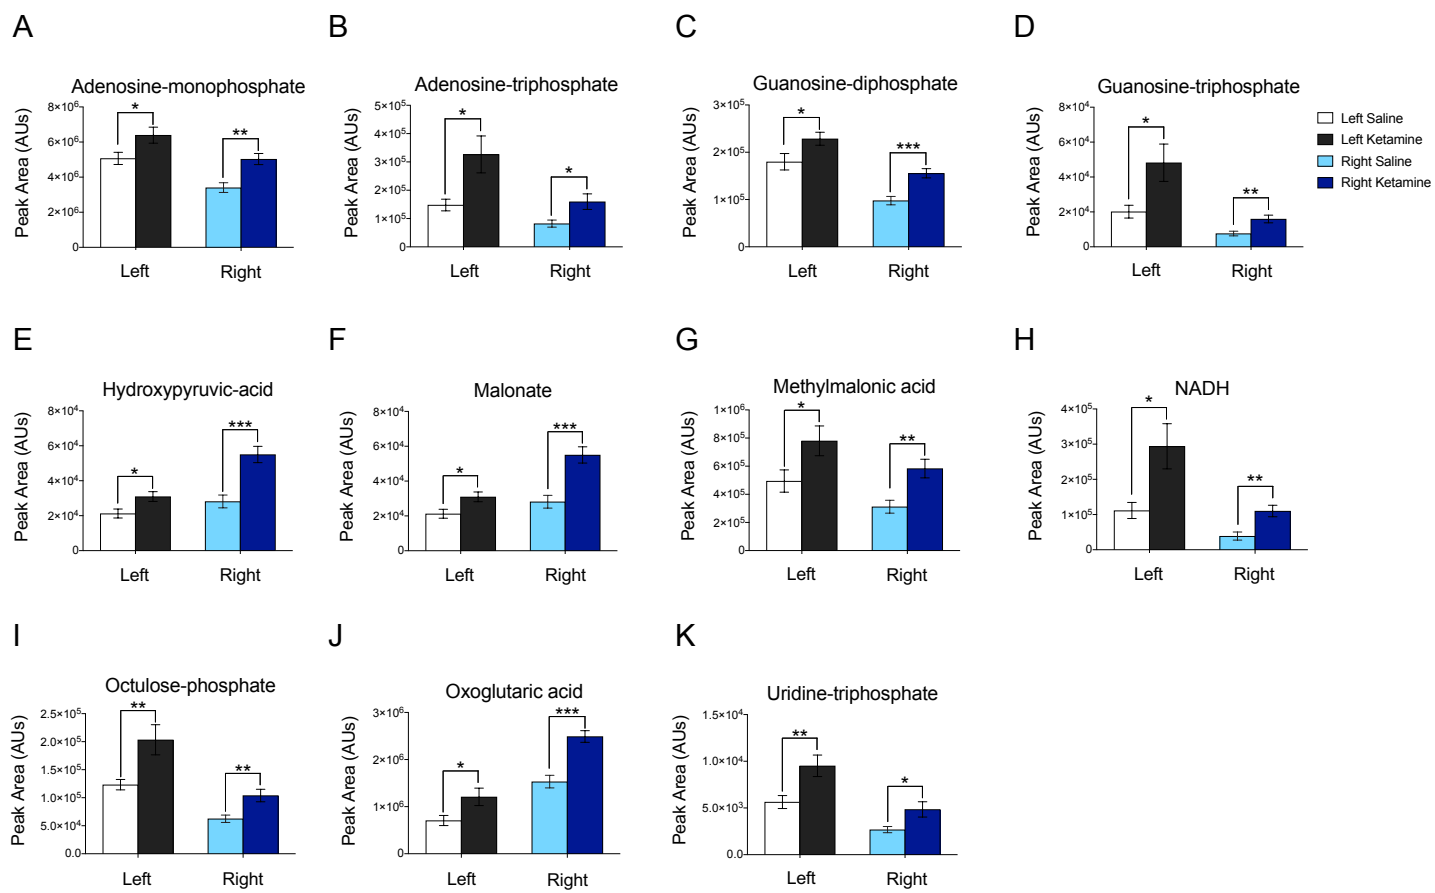

Supplement: 41386_2018_43_MOESM3_ESM.pdf [file 41386_2018_43_MOESM3_ESM.pdf]

## HPC Positive Mode

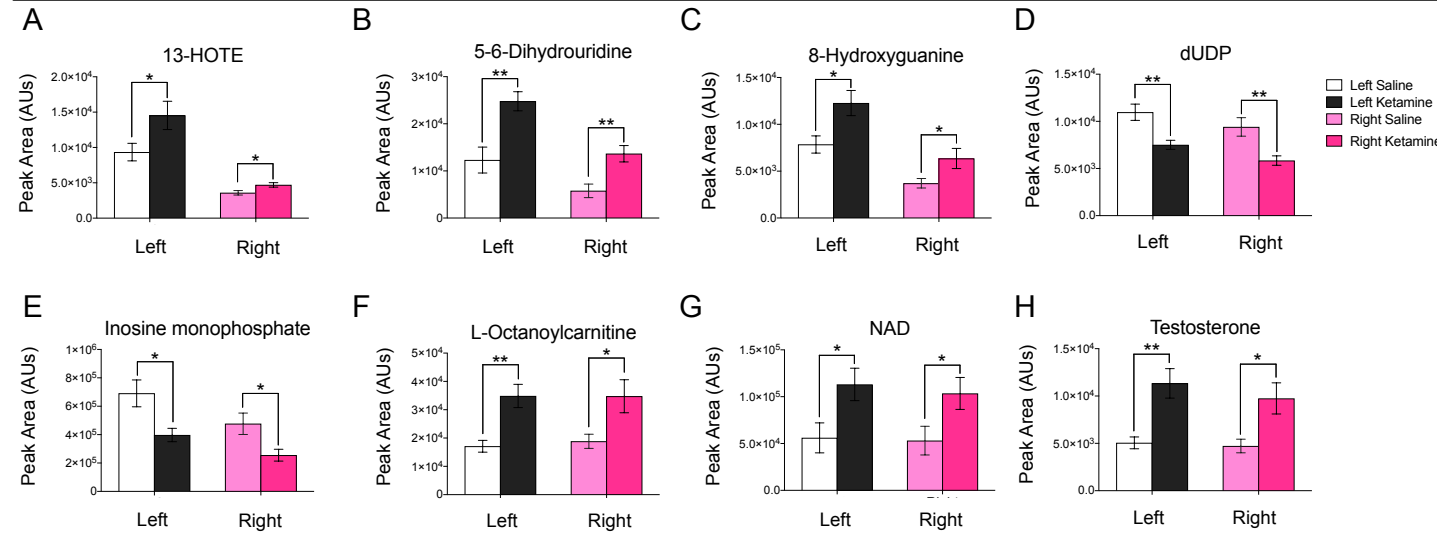

## HPC Negative Mode

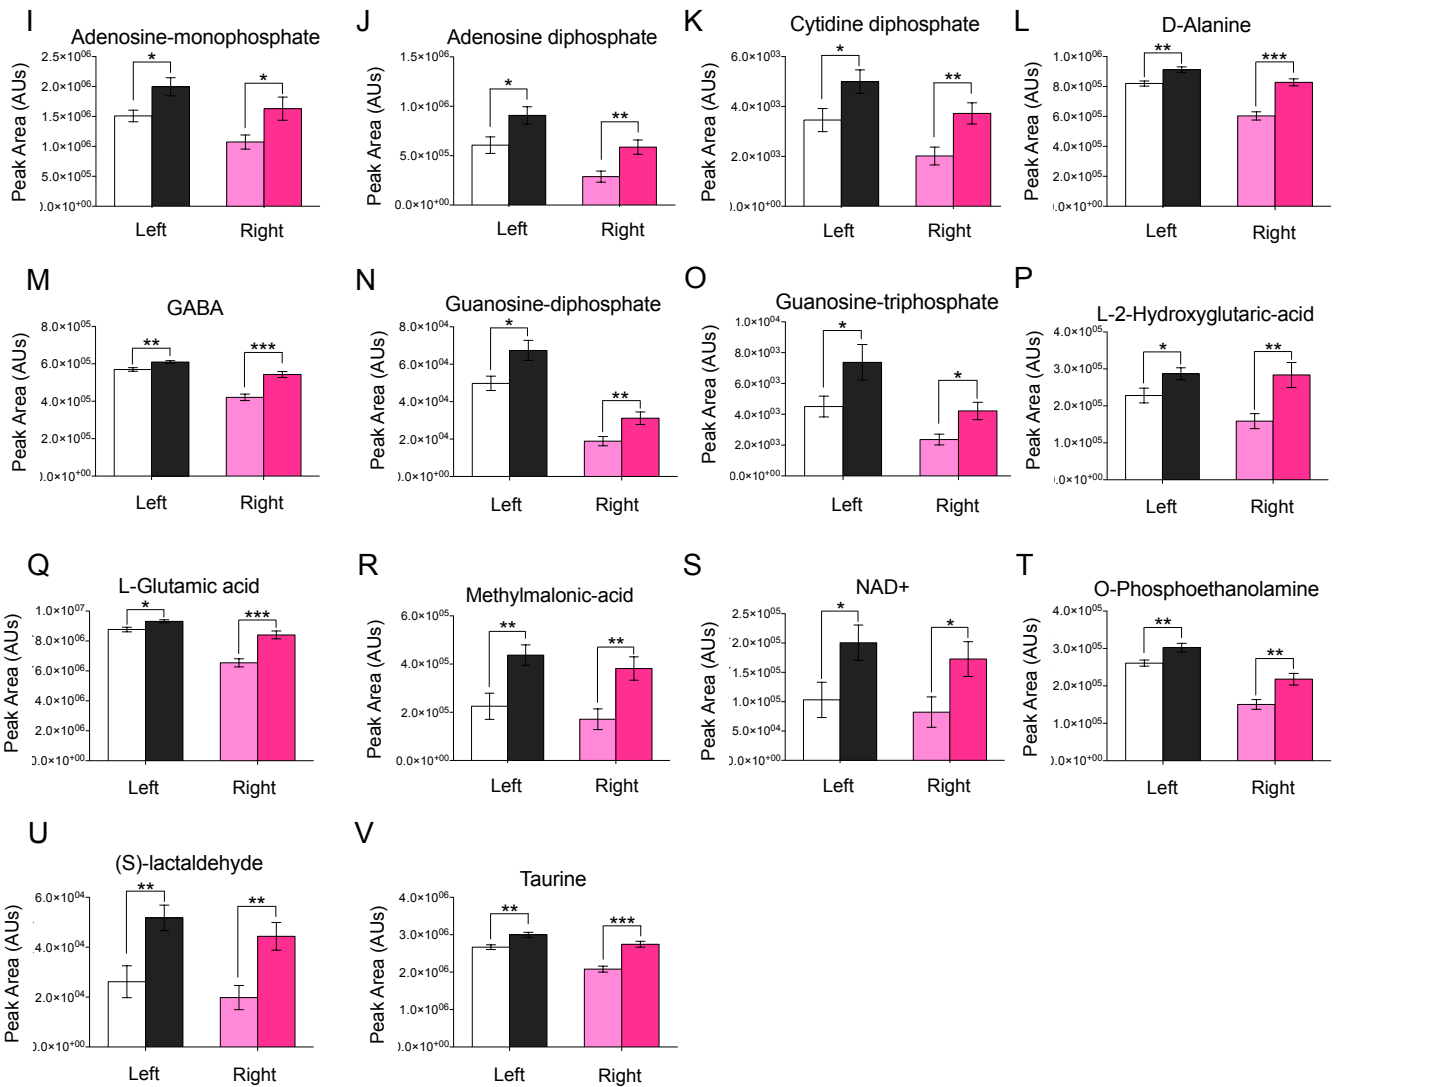

Supplement: 41386_2018_43_MOESM4_ESM.pdf [file 41386_2018_43_MOESM4_ESM.pdf]

Purine

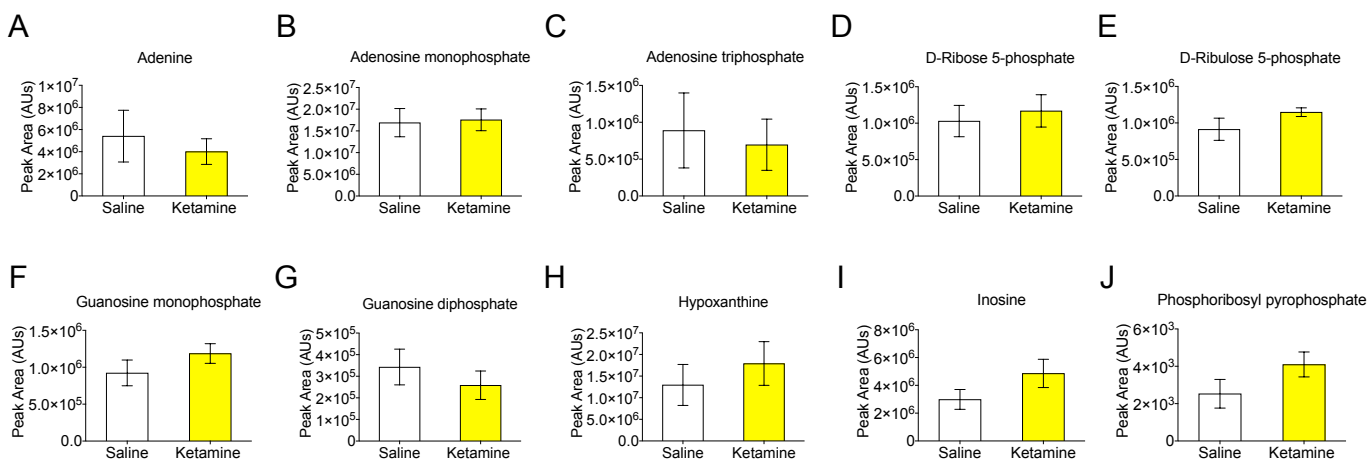

Pyrimidine

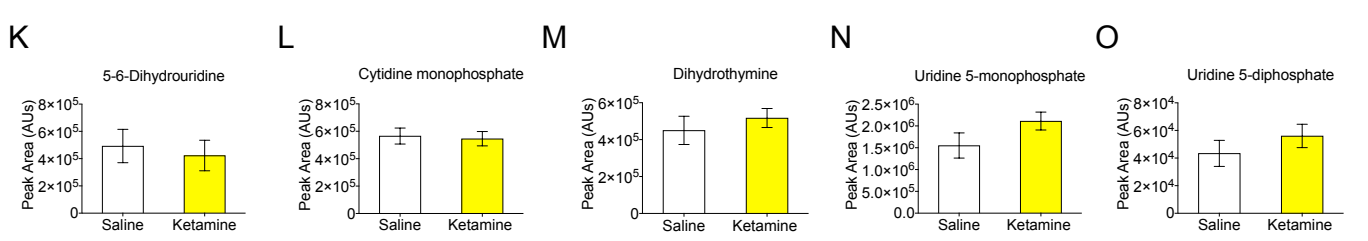

Supplement: 41386_2018_43_MOESM6_ESM.pdf [file 41386_2018_43_MOESM6_ESM.pdf]
